# Supplementary material for: G-Quadruplex DNA-binding quaternary alkaloids from Tylophora atrofolliculata
Source: Royal Society of Chemistry journal article supplement (doi:10.1039/c6ra21056b), 2016-01-01
Supplement: c6ra21056b1.pdf [file c6ra21056b1.pdf]

1 **G-quadruplex DNA-binding quaternary alkaloids from *Tylophora***

2 ***atrofolliculata***

3 Cheng-Yu Chen<sup>1</sup>, Li-Ping Bai<sup>1</sup>, Zhuo-feng Ke<sup>2</sup>, Yan Liu<sup>3</sup>, Jing-Rong Wang<sup>1\*</sup>, Zhi-

4 Hong Jiang<sup>1\*</sup>

5 <sup>1</sup>State Key Laboratory of Quality Research in Chinese Medicine, Macau Institute for Applied Research in Medicine

6 and Health, Macau University of Science and Technology, Taipa, Macau, China

7 <sup>2</sup>School of Materials Science and Engineering, MOE Key Laboratory of Bioinorganic and Synthetic Chemistry,

8 School of Chemistry, Sun Yat-sen University, Guangzhou 510275, PR China

9 <sup>3</sup>School of chemical engineering and light industry, Guangdong University of Technology Guangzhou 510006, PR

10 China

11

12 **Contents**

13 **Figures S1 and S2** Fluorescent spectra

14 **Figure S3** Molecular modeling of alkaloids **6** and **7** binding with human telomeric G-  
15 quadruplex DNA (PDB entry 2JPZ)

16 **Figures S4-S23** <sup>1</sup>H, <sup>13</sup>C NMR, HSQC, HMBC and <sup>1</sup>H-<sup>1</sup>H COSY spectra of  
17 compounds **1-4**.

18 **Table S1** Percent fluorescence decrease of TO at the maximum emission wavelength  
19 of 530 nm by compound **6** or **7** displacement

20 **Tables S2** <sup>1</sup>H-NMR (600 MHz) and <sup>13</sup>C-NMR (150 MHz) spectral data of **6**.

21

22 \*Corresponding authors. E-mail address: jrwang@must.edu.mo and zhjiang@must.edu.mo

23

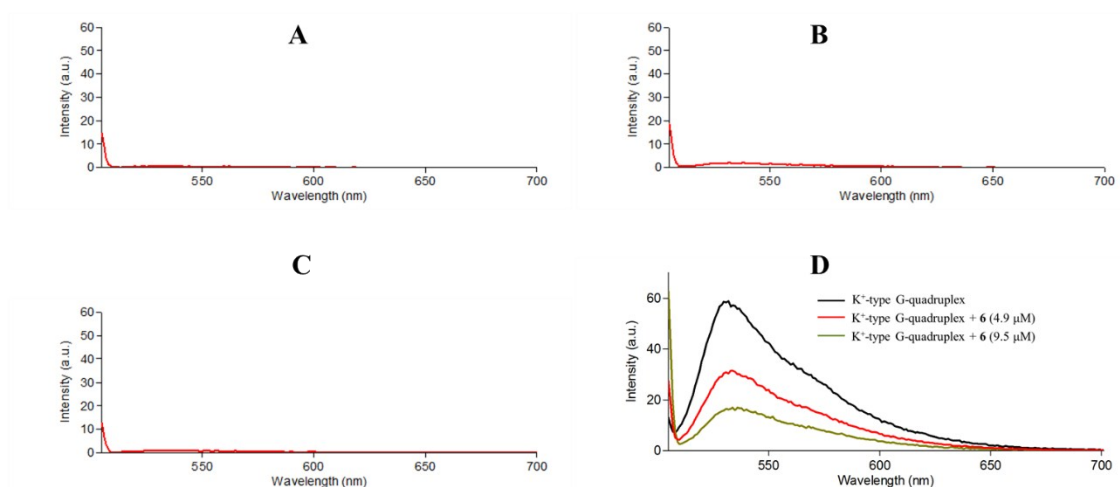

24

25 Figure S1 Fluorescent spectra. The spectra of 0.5 μM triazole orange (A), 9.5 μM  
26 compound 6 (B), 9.5 μM compound 6 with 0.25 μM DNA G-quadruplex (C) in 25 mM  
27 Tris-HCl buffer (pH 7.45) containing 100 mM KCl. The fluorescence spectra of 0.5 μM  
28 triazole orange with 0.25 μM d[(TTAGGG)<sub>4</sub>TTA] (D). All the spectra were measured  
29 with the excitation wavelength at 501 nm.

30

31

32

33

34

35

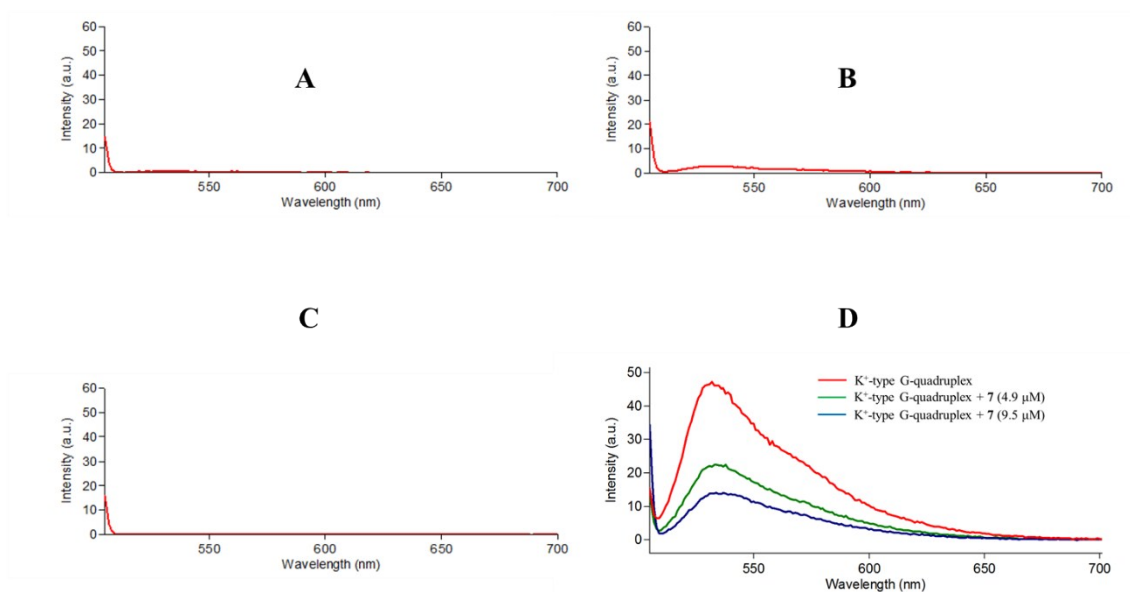

36

37 Figure S2 Fluorescent spectra. The spectra of 0.5  $\mu\text{M}$  triazole orange (A), 9.5  $\mu\text{M}$   
 38 compound 7 (B), 9.5  $\mu\text{M}$  compound 7 with 0.25  $\mu\text{M}$  DNA G-quadruplex (C) in 25 mM  
 39 Tris-HCl buffer (pH 7.45) containing 100 mM KCl. The fluorescence spectra of 0.5  $\mu\text{M}$   
 40 triazole orange with 0.25  $\mu\text{M}$  d[(TTAGGG)<sub>4</sub>TTA] (D). All the spectra were measured  
 41 with the excitation wavelength at 501 nm.

42

#### 43 Docking simulations

44 The receptor human telomeric DNA d[(TTAGGG)<sub>4</sub>TTA] G-quadruplex was obtained  
 45 from the Protein Data Bank (PDB entry 2JPZ).<sup>1</sup> Gasteiger partial charges are assigned  
 46 and non-polar hydrogen atoms are merged with AutoDock Tools. The whole 3-D space  
 47 of the receptors is searched to obtain the most possible binding sites. The grid maps  
 48 were calculated using a 120 $\times$ 120 $\times$ 120 points grid box with 0.375 Å grid-point spacing.  
 49 All the docking simulations were performed with the AutoDock4.2 program.<sup>2</sup> The  
 50 Lamarckian genetic algorithm was used for each compound. At least 80 docking runs

51 were performed, using a population size of 250 individuals with a maximum number  
52 of energy evaluations at  $2.5 \times 10^8$  and a maximum number of generations at  $2.7 \times 10^4$ .  
53 To estimate the energetics of the unbound states of the receptor and the compounds, an  
54 extended model was used to evaluate their binding free energies.

55

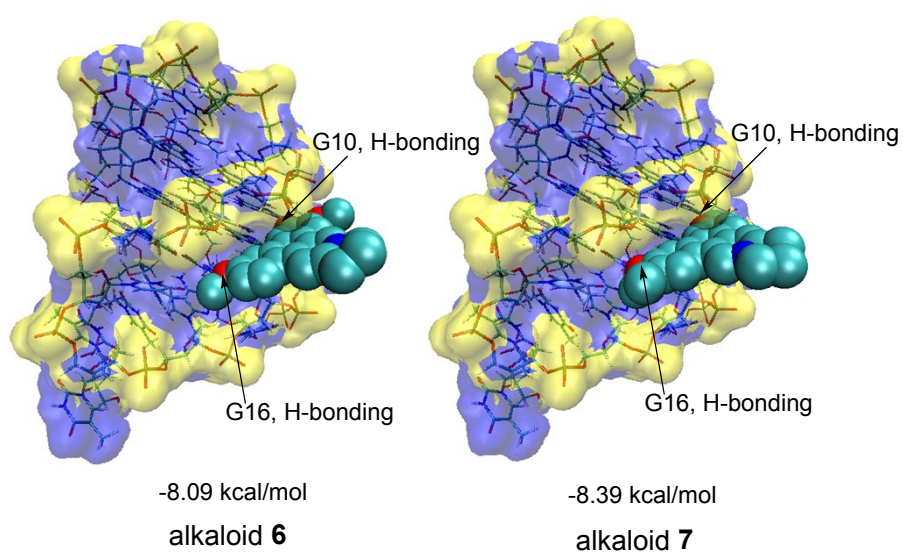

56

57 Figure S3. Molecular modeling of alkaloids **6** and **7** binding with human telomeric G-  
58 quadruplex DNA (PDB entry 2JPZ).

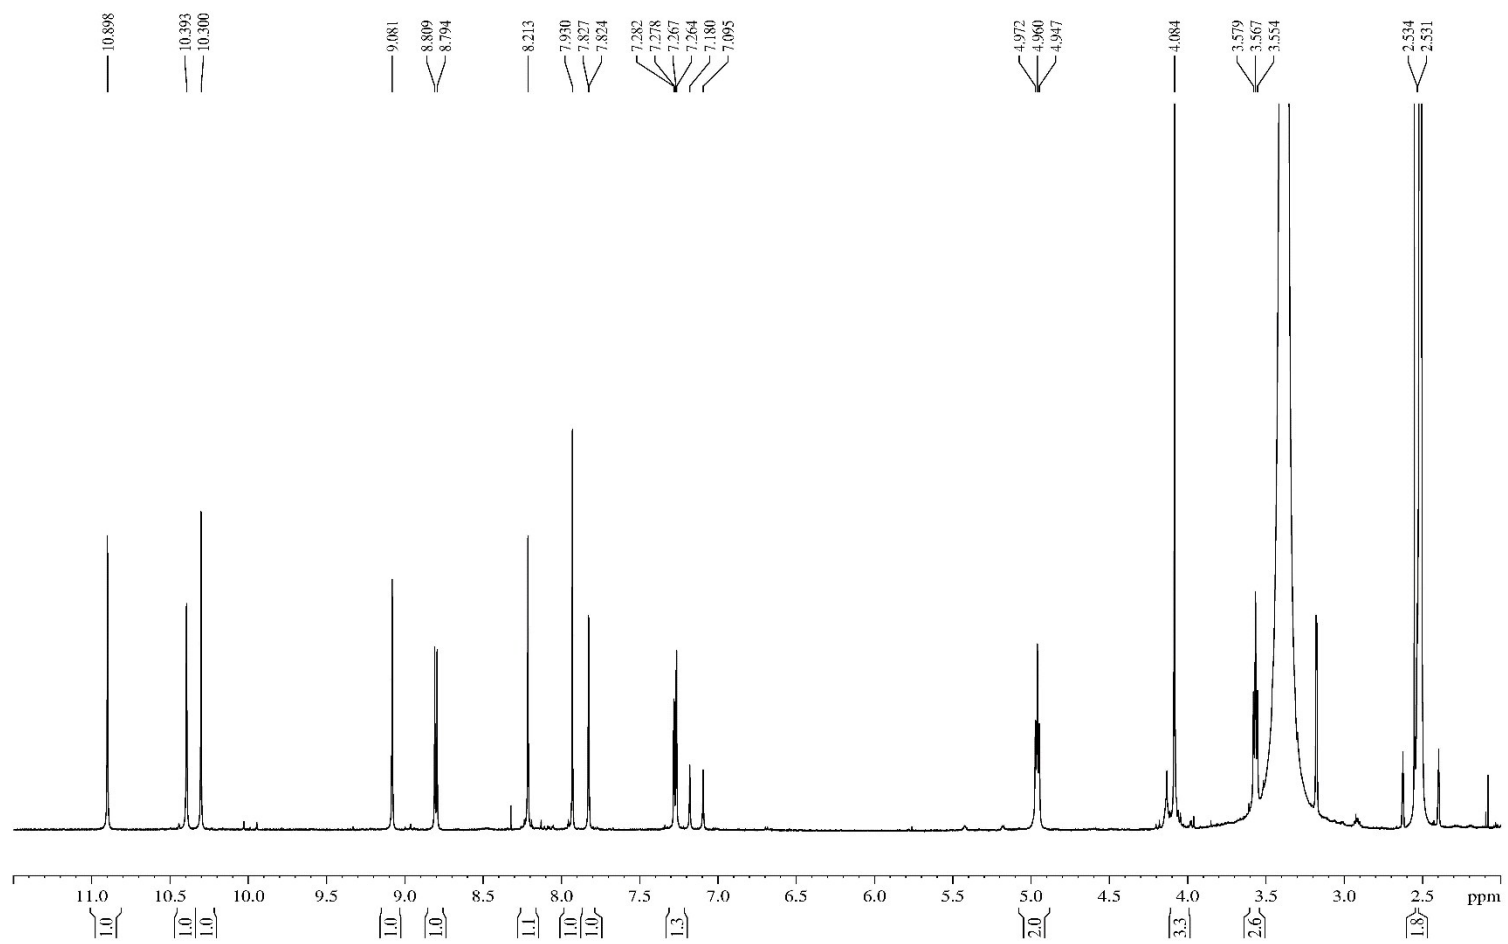

59

60

61

**Figure S4**  $^1\text{H}$  NMR spectrum of compound **1**.

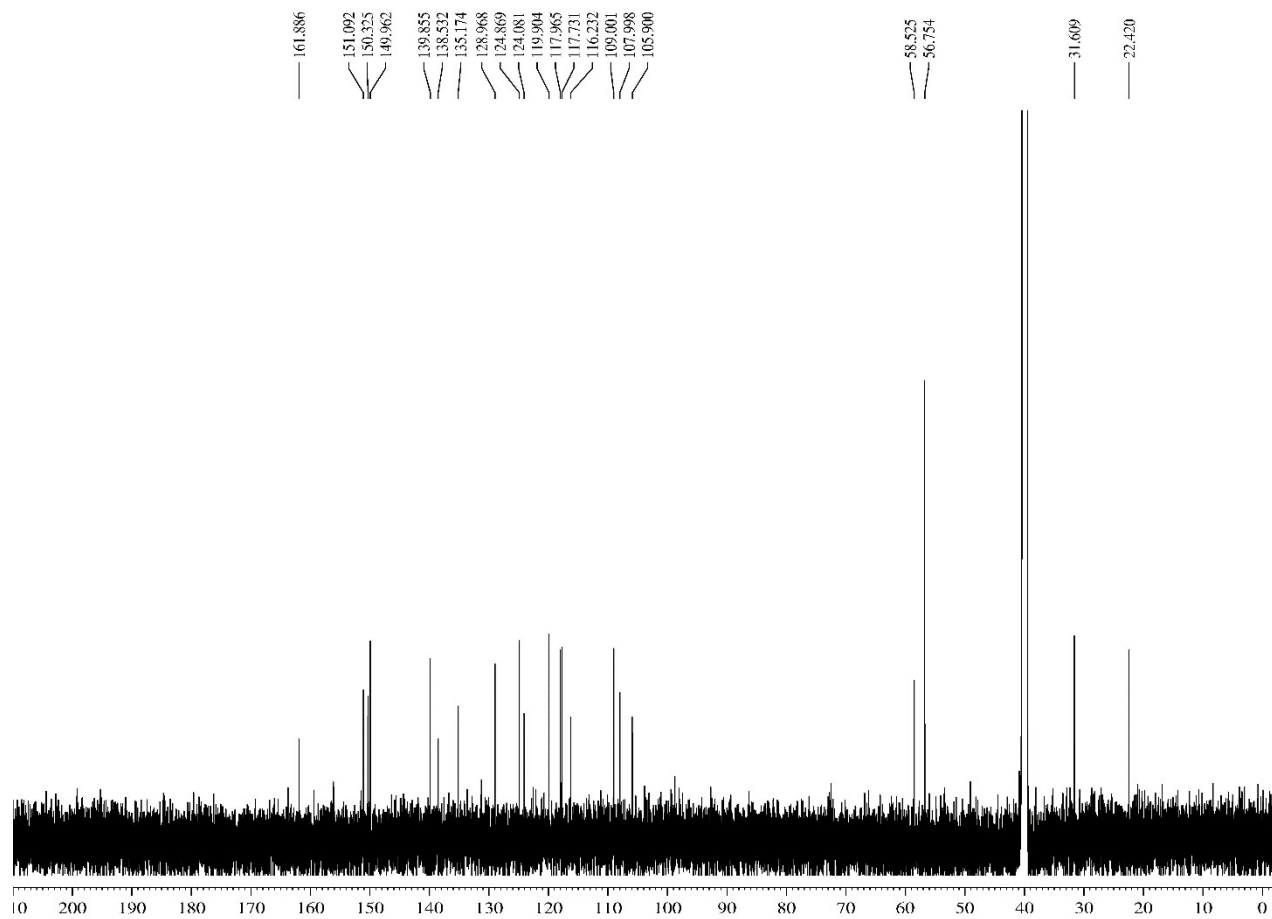

62

63

Figure S5  $^{13}\text{C}$  NMR spectrum of compound 1.

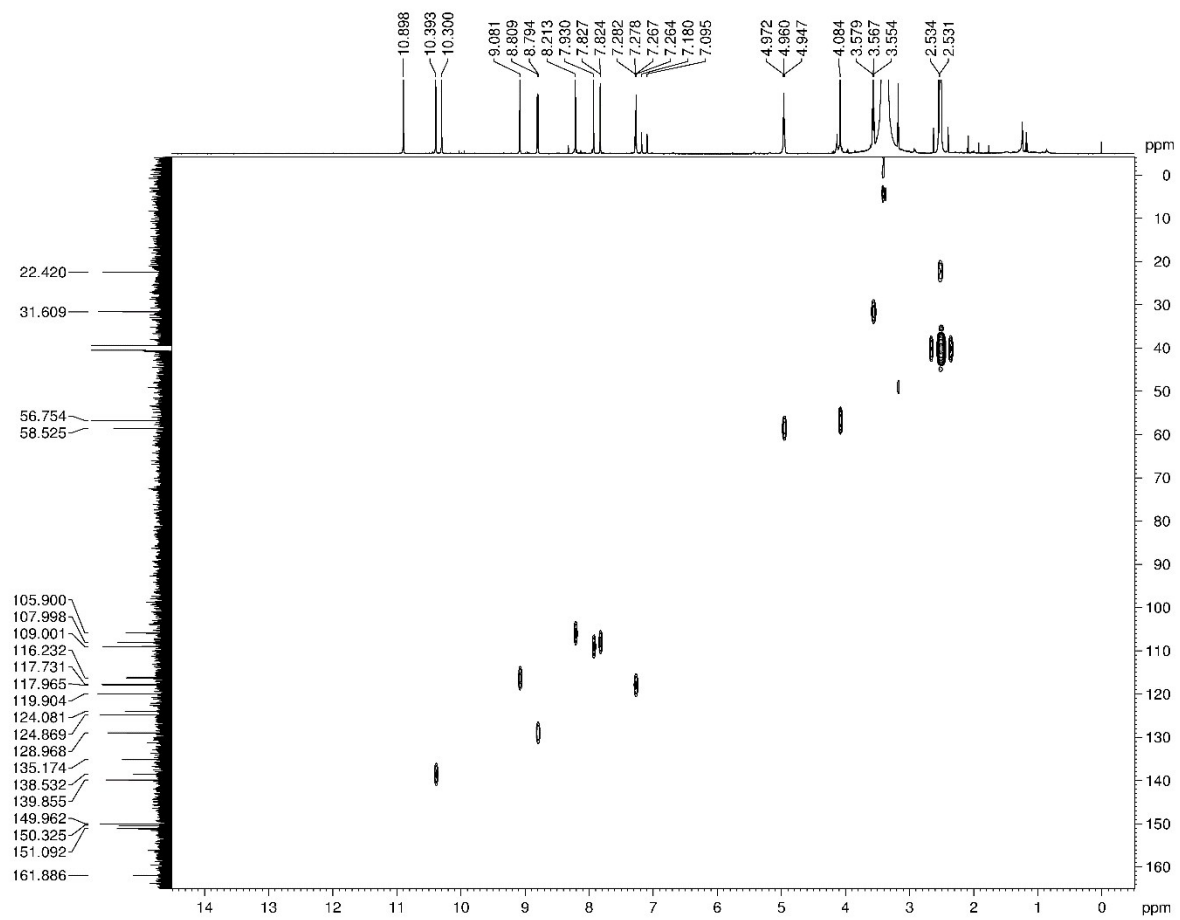

64

65

Figure S6 HSQC spectrum of compound 1.

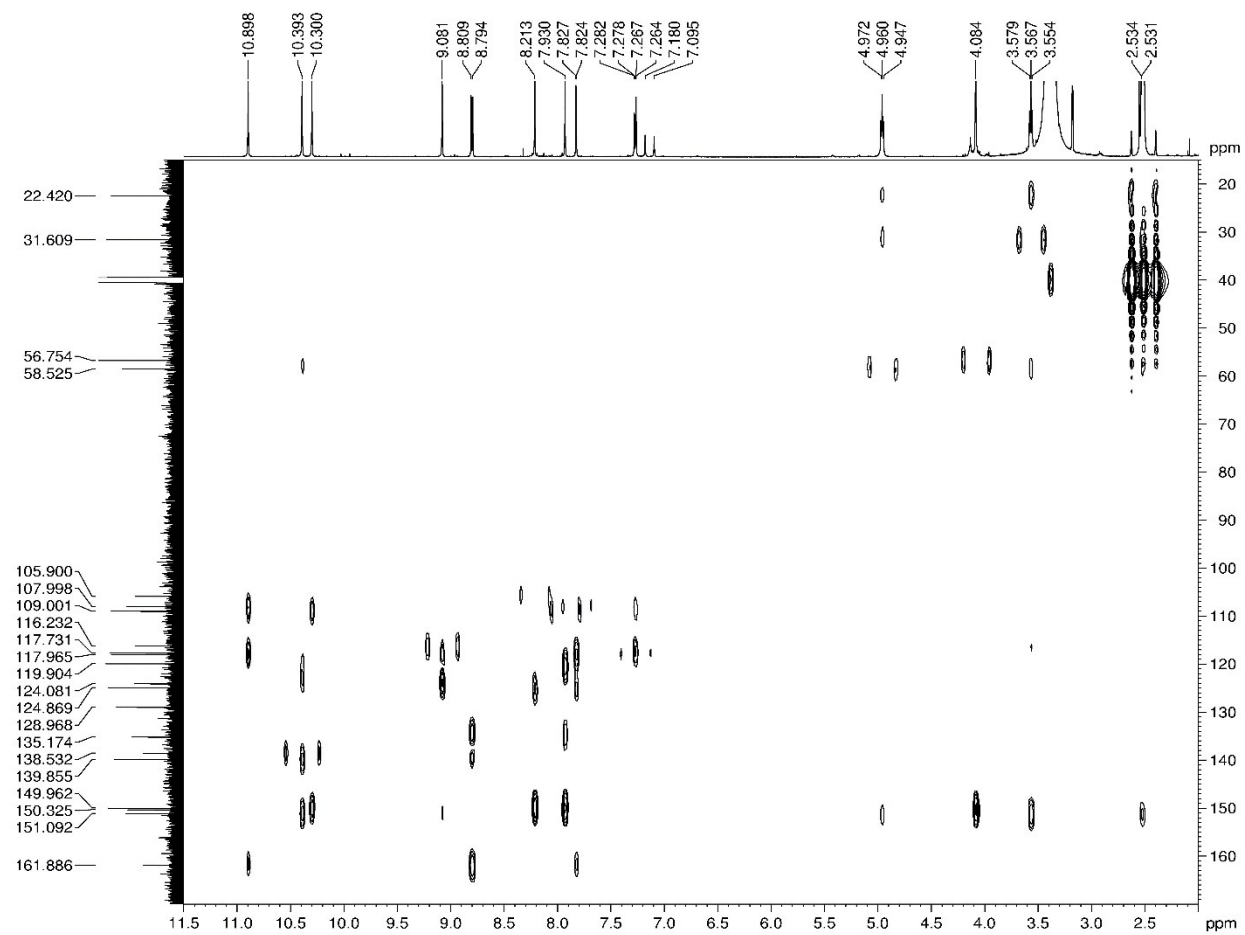

Figure S7 HMBC spectrum of compound 1.

66

67

68



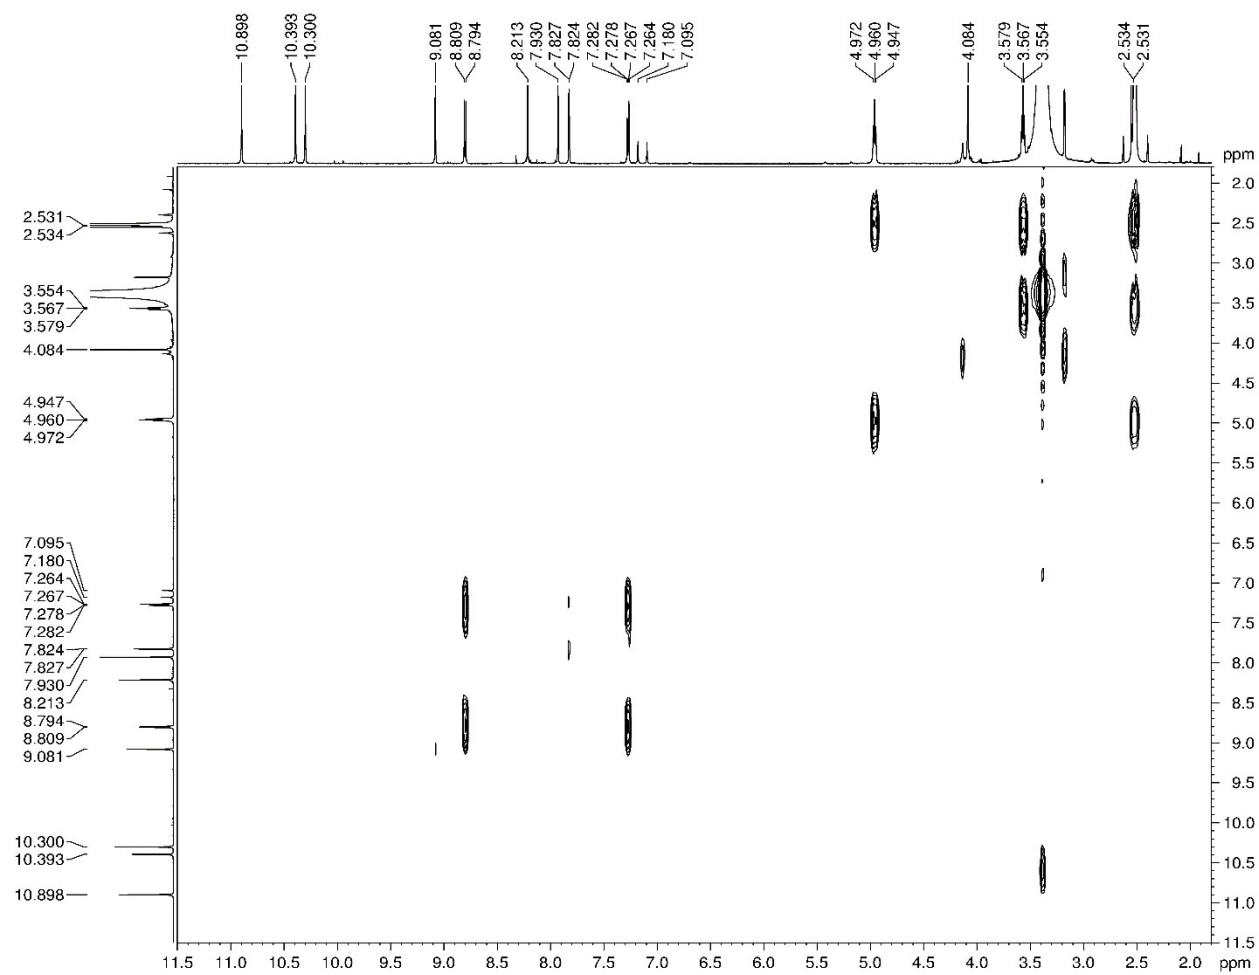

69

70

Figure S8  $^1\text{H}$ - $^1\text{H}$  COSY spectrum of compound 1.

71

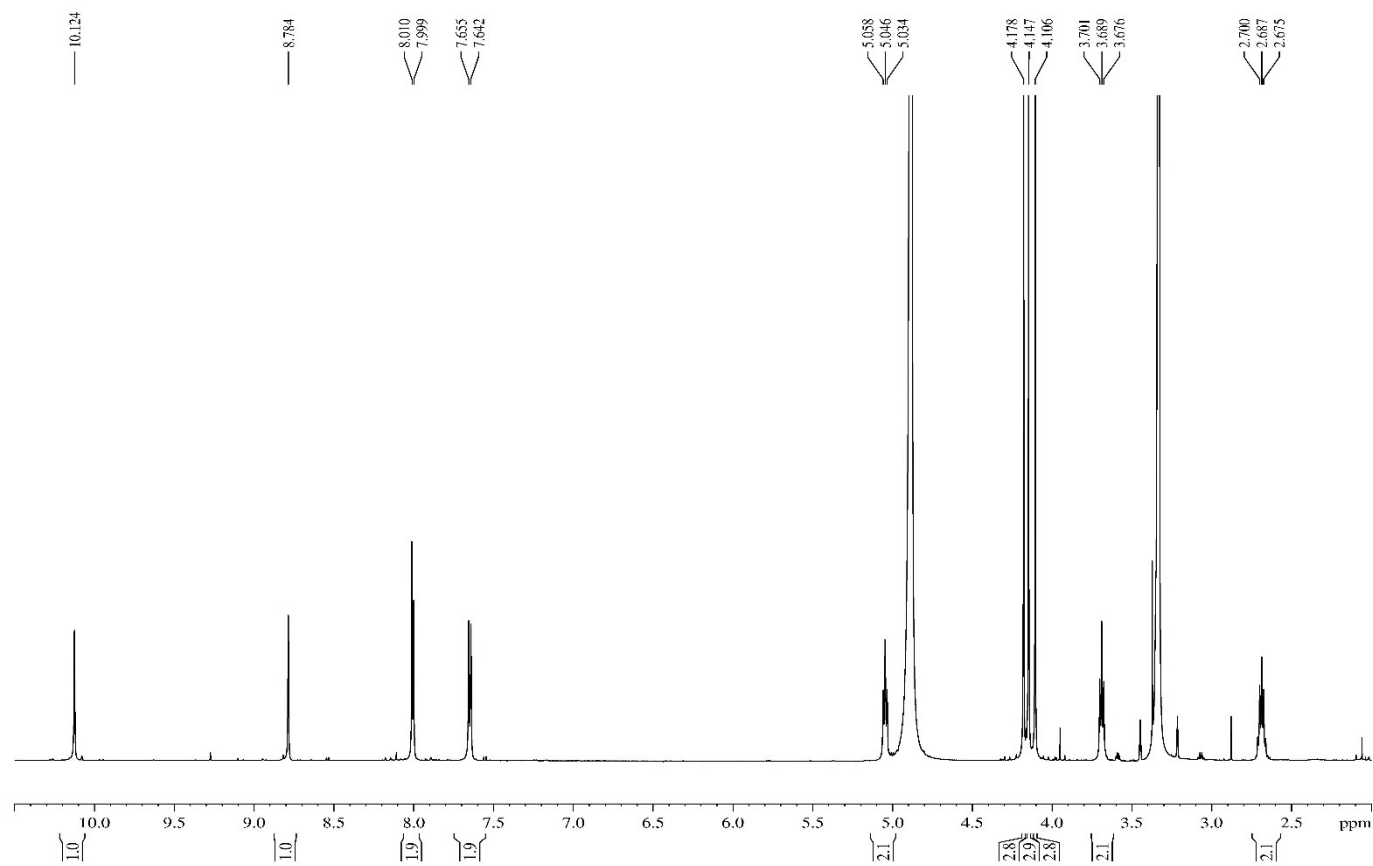

72

73

**Figure S9** <sup>1</sup>H NMR spectrum of compound 2.

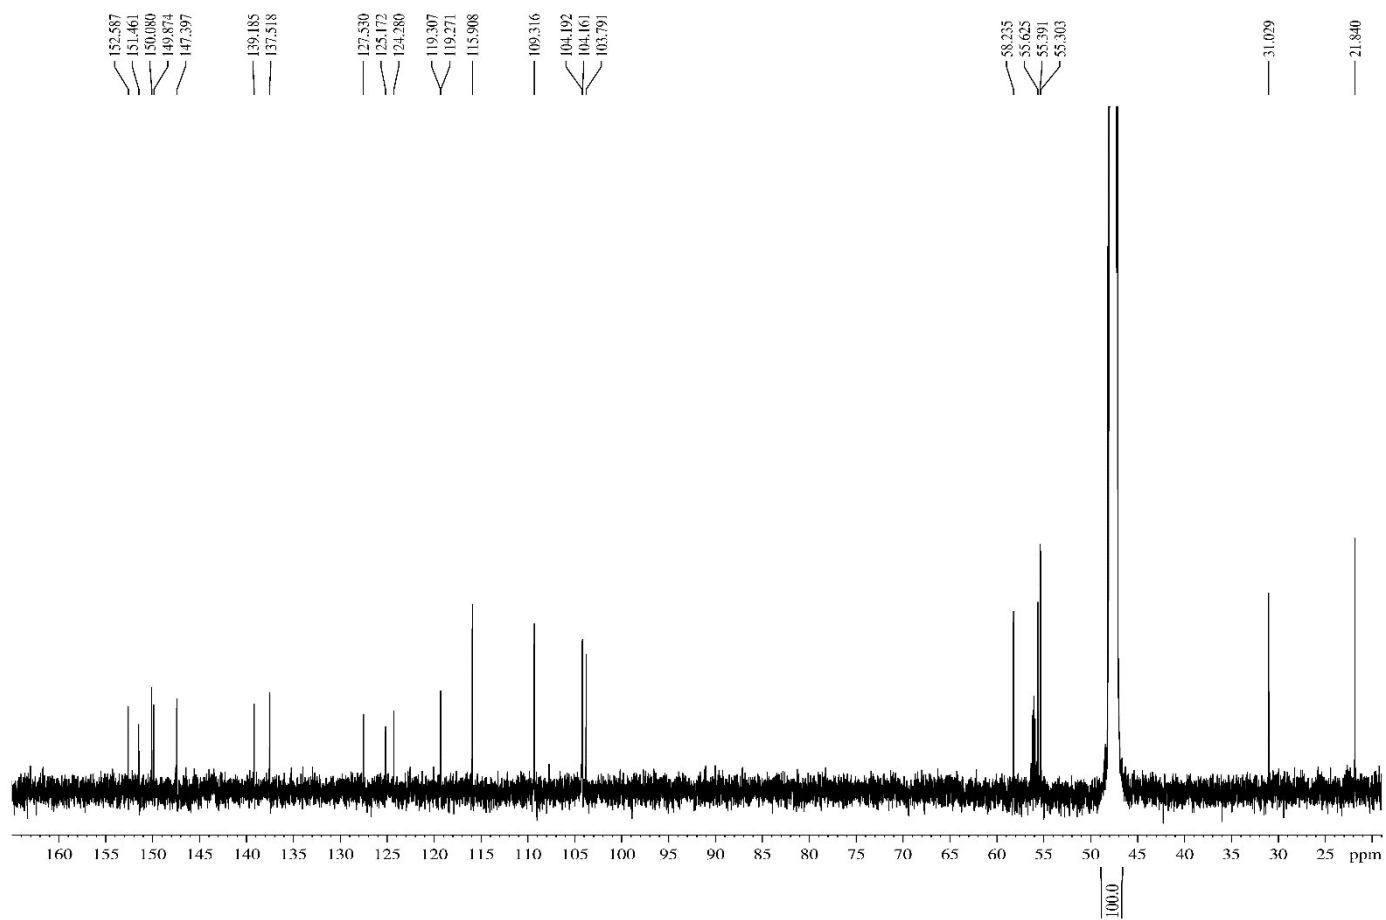

74

75

76

**Figure S10**  $^{13}\text{C}$  NMR spectrum of compound **2**.

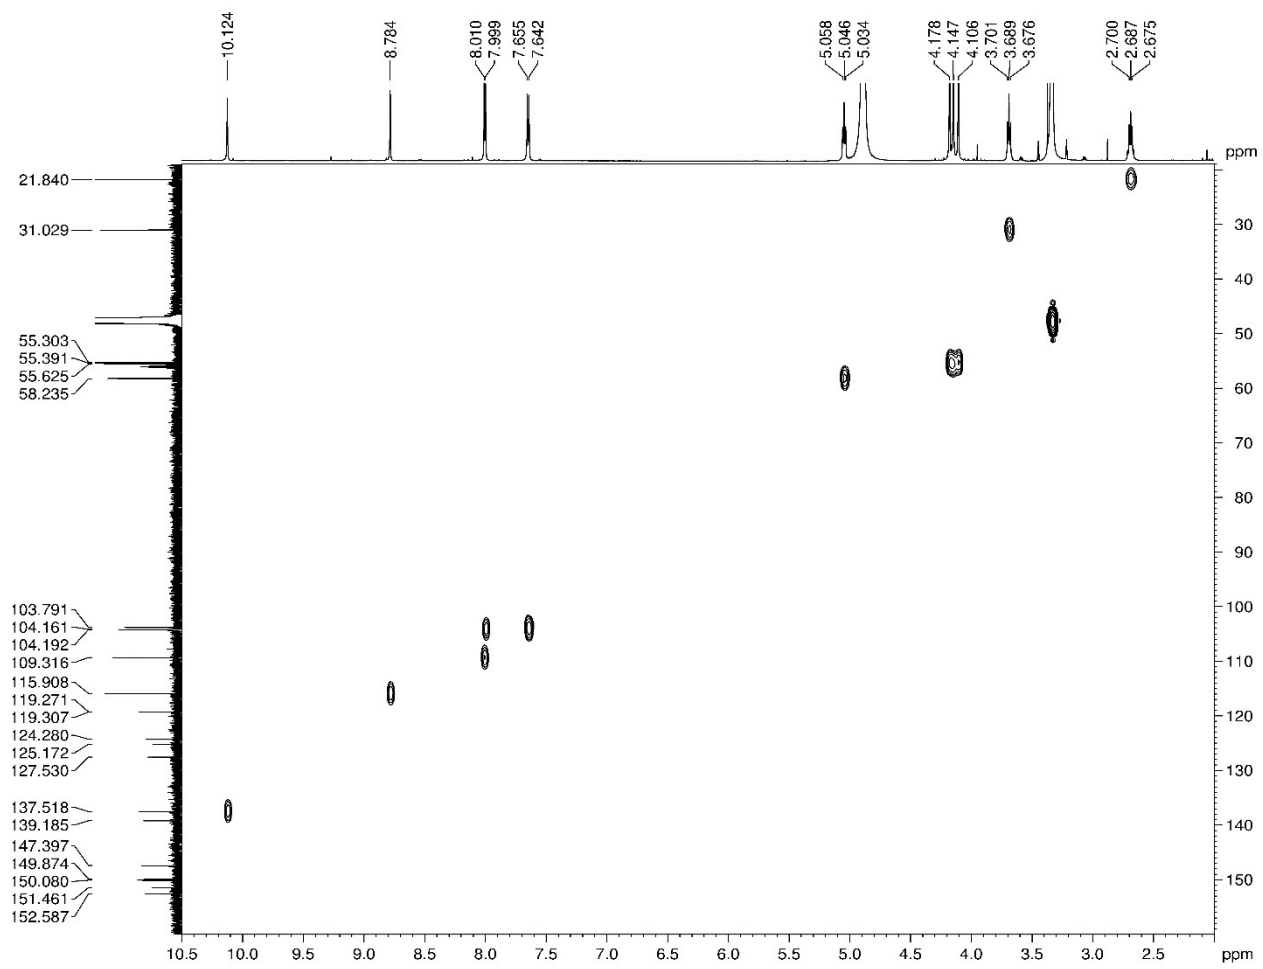

77

78

Figure S11 HSQC spectrum of compound 2.

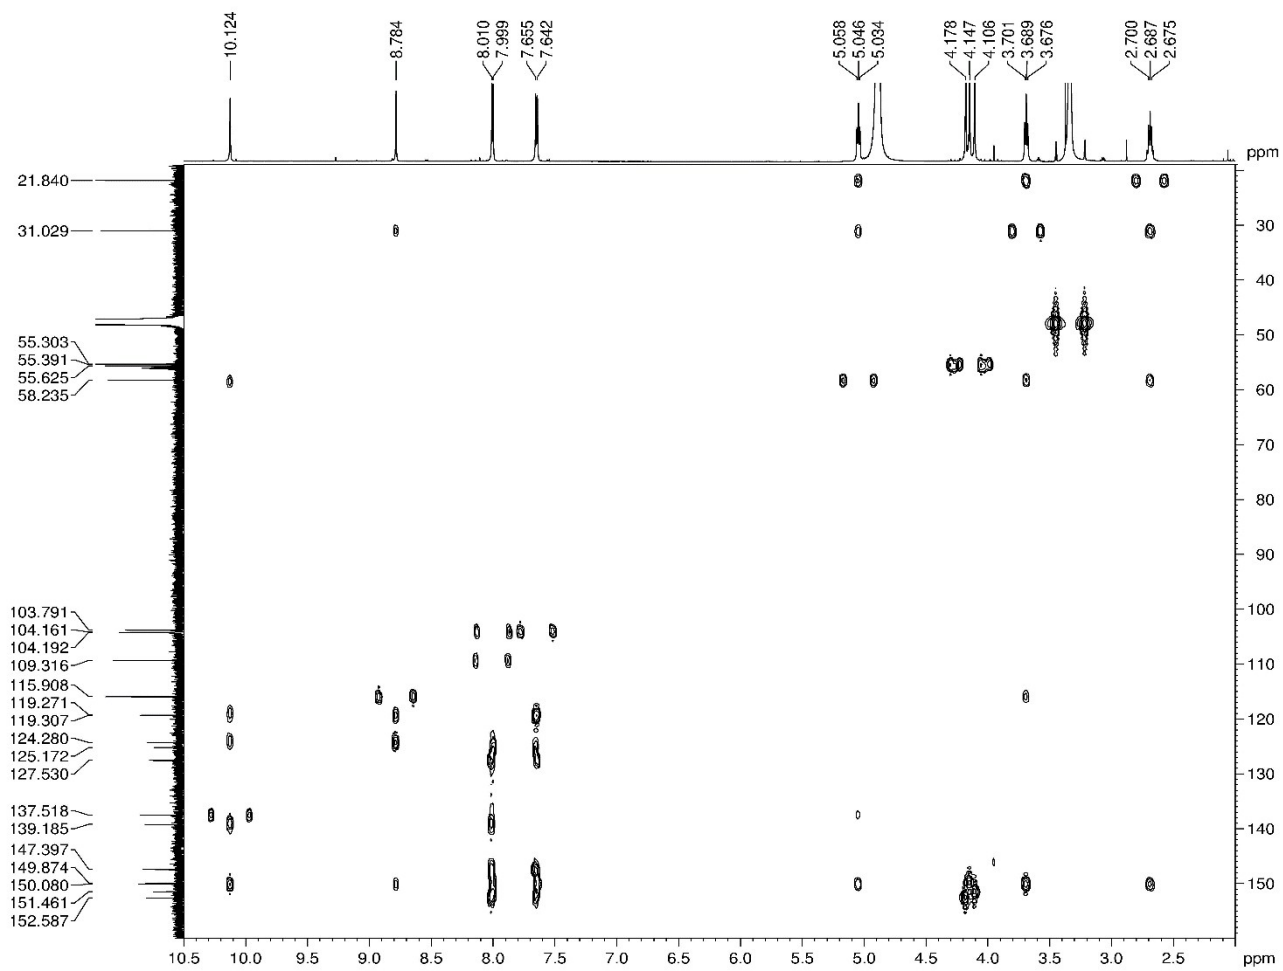

79

80

Figure S12 HMBC spectrum of compound 2.

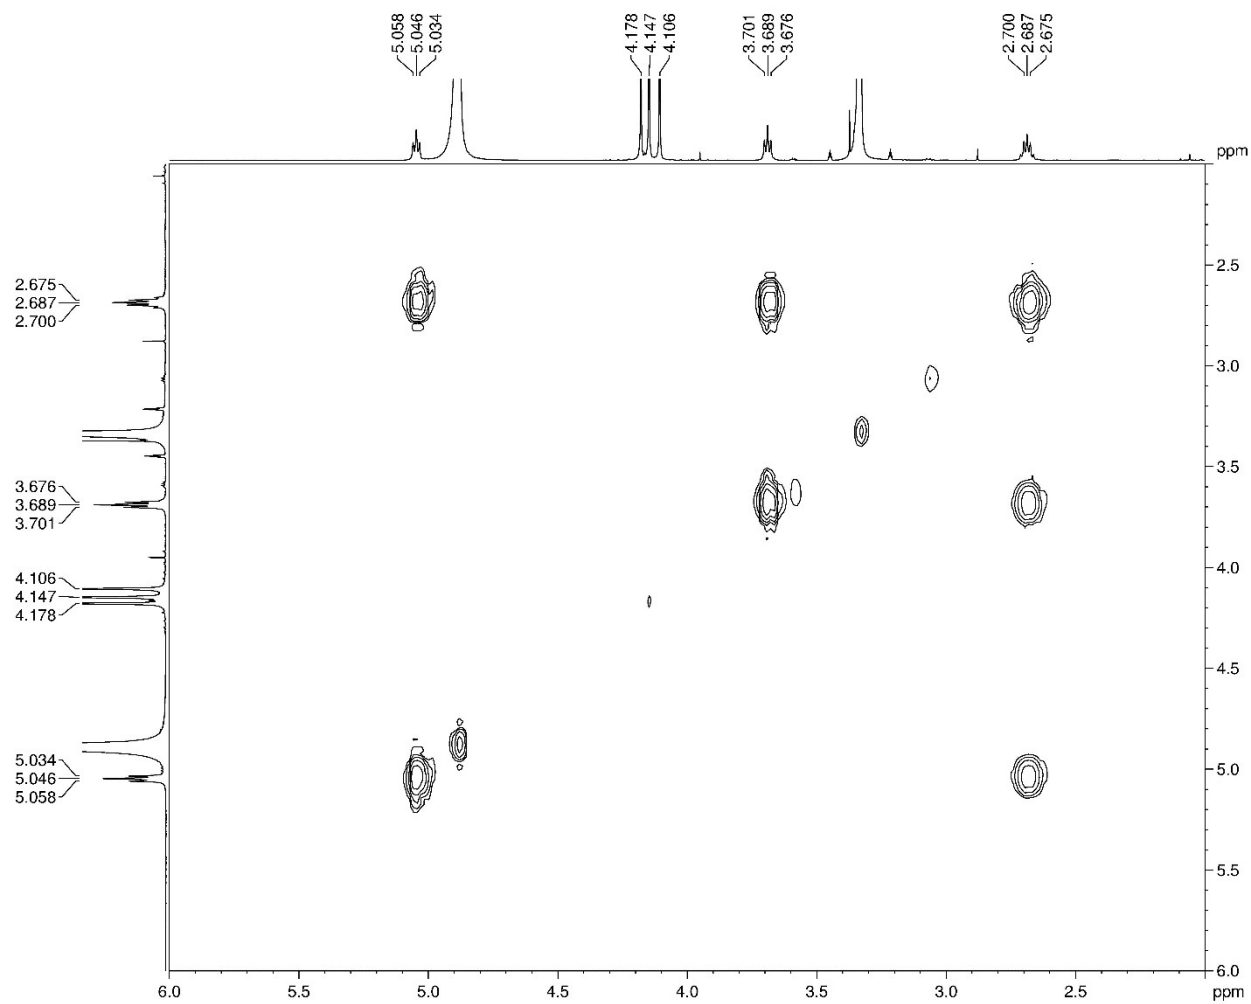

81

82

**Figure S13**  $^1\text{H}$ - $^1\text{H}$  COSY spectrum of compound **2**.

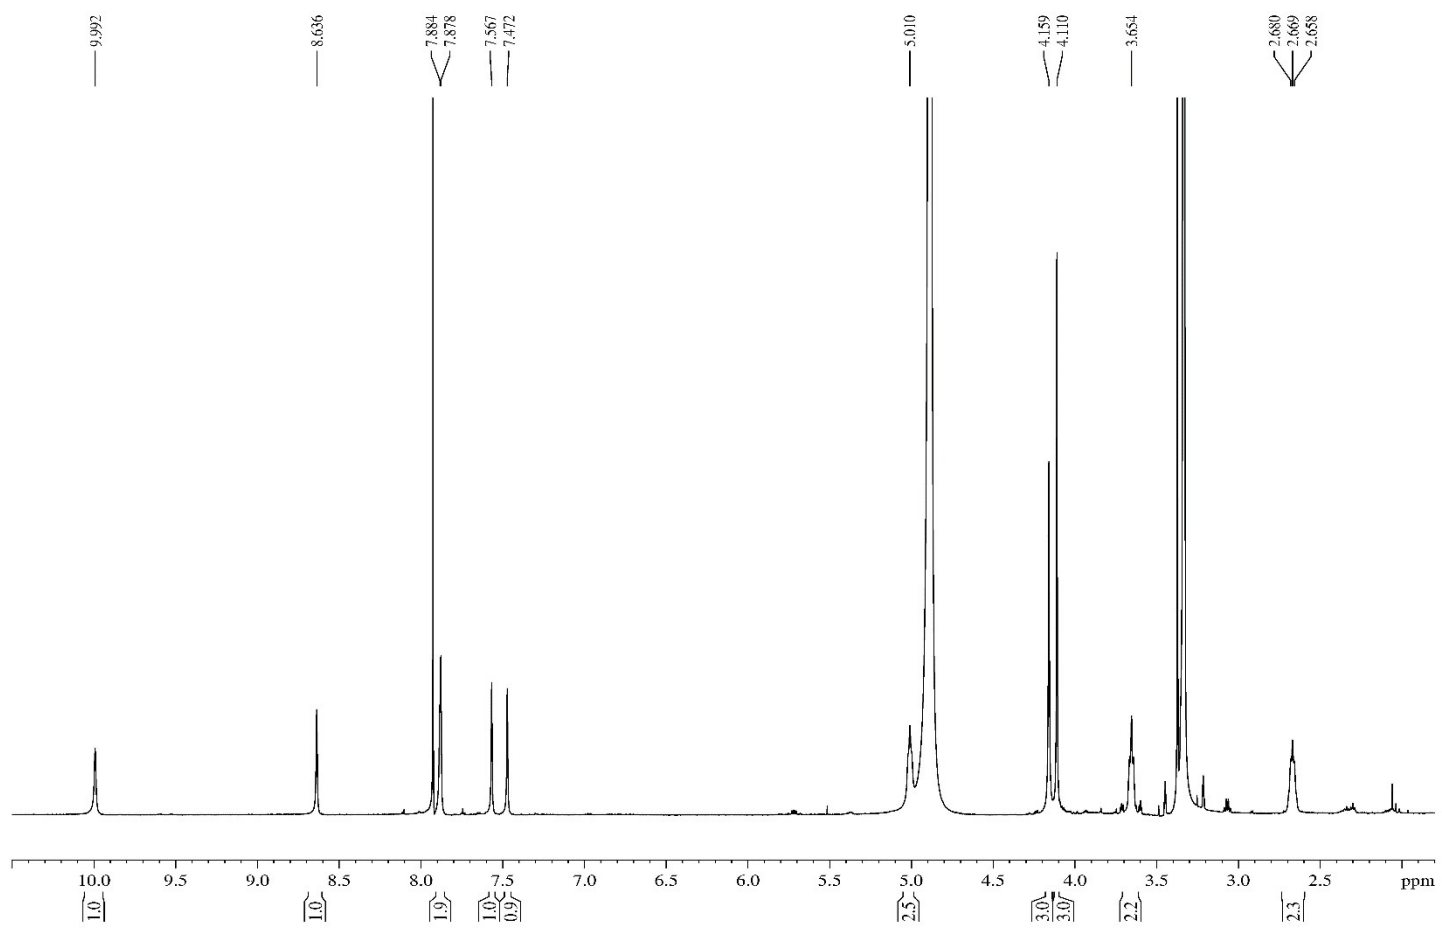

83

84

Figure S14 <sup>1</sup>H NMR spectrum of compound 3.

85

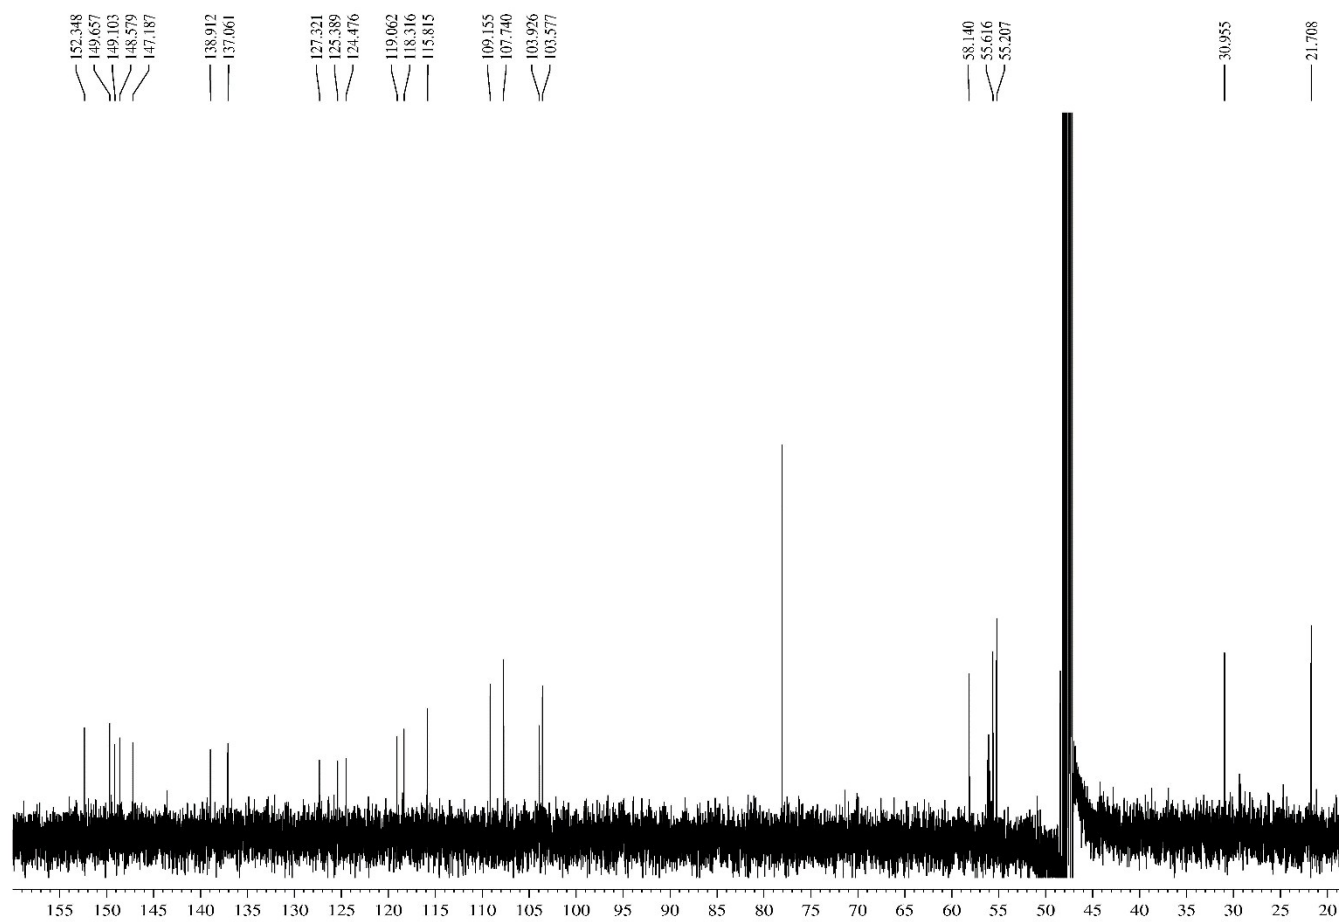

86

87

**Figure S15**  $^{13}\text{C}$  NMR spectrum of compound 3.



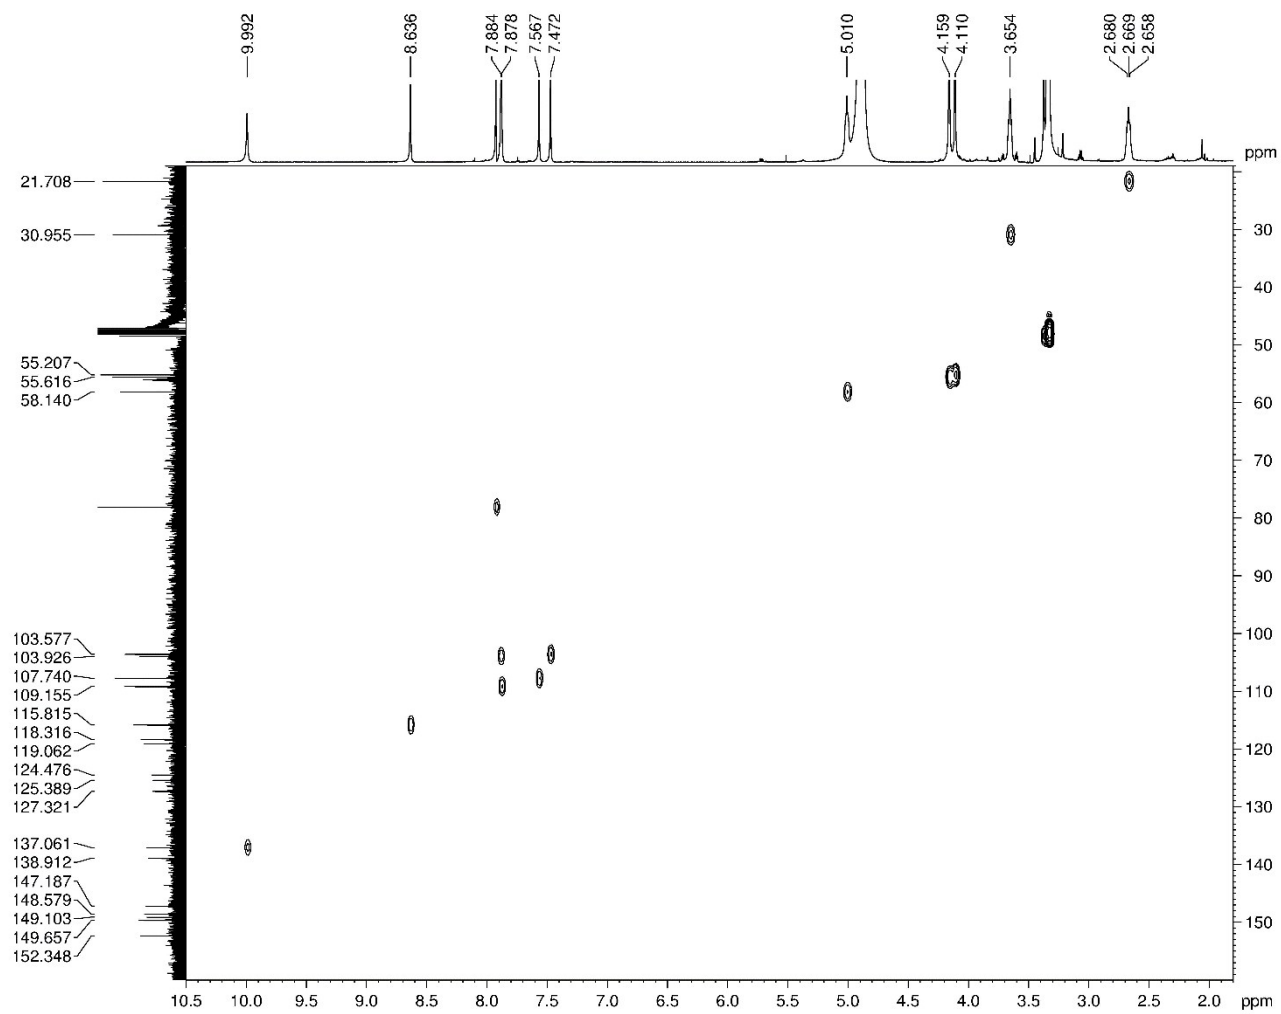

88

89

Figure S16 HSQC spectrum of compound 3.

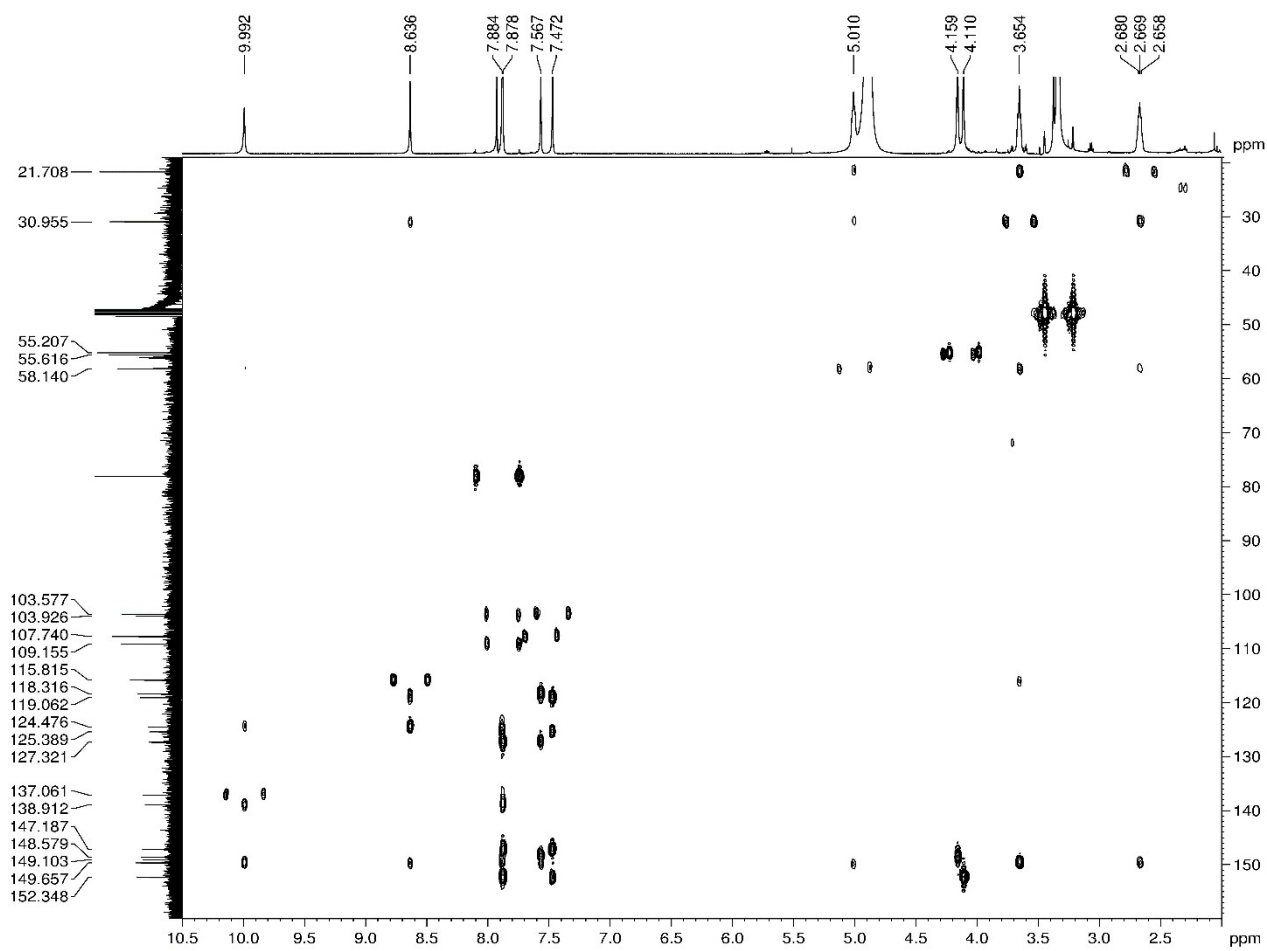

Figure S17 HMBC spectrum of compound 3.

90

91

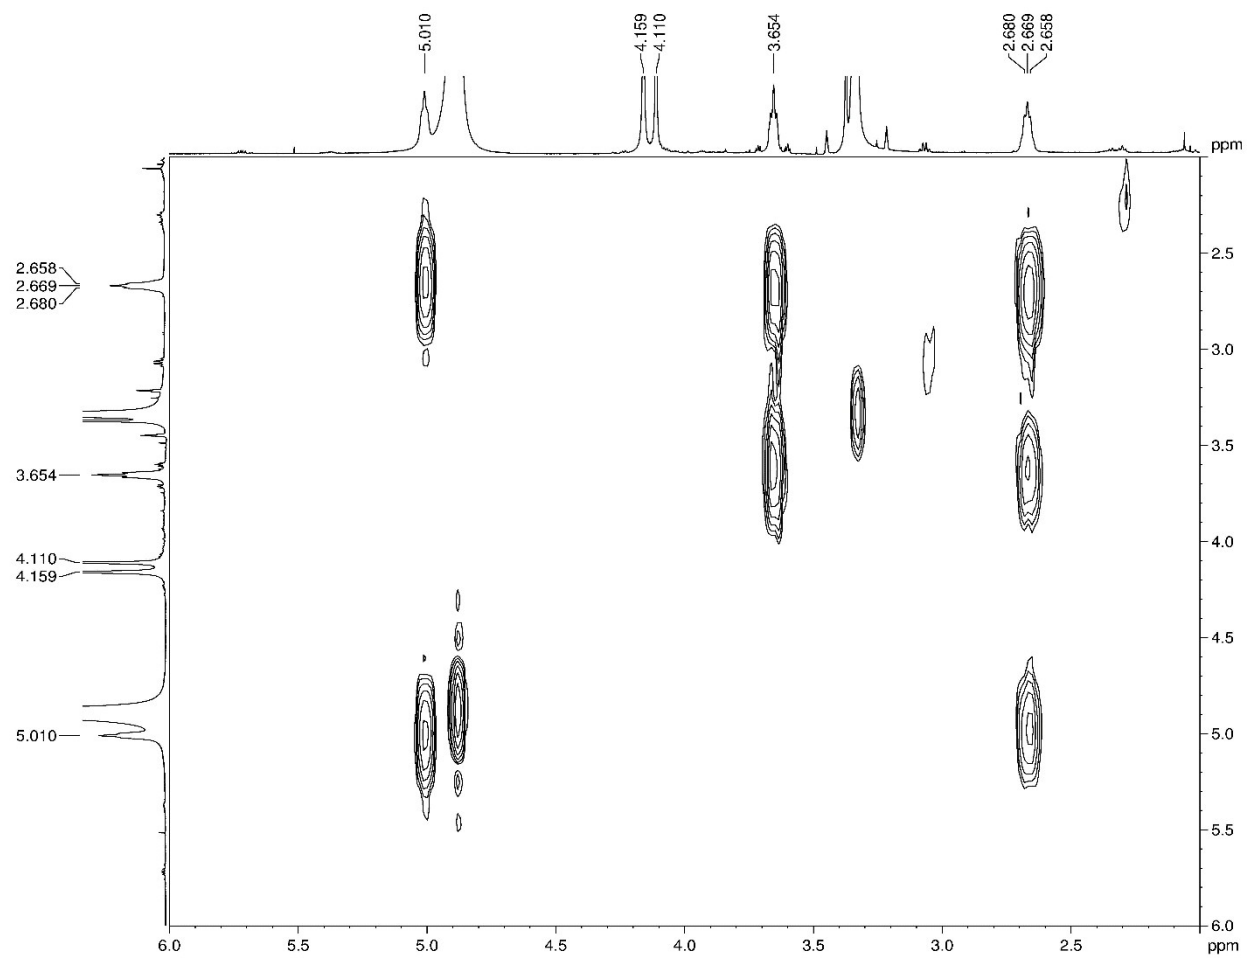

92

93

**Figure S18**  $^1\text{H}$ - $^1\text{H}$  COSY spectrum of compound **3**.

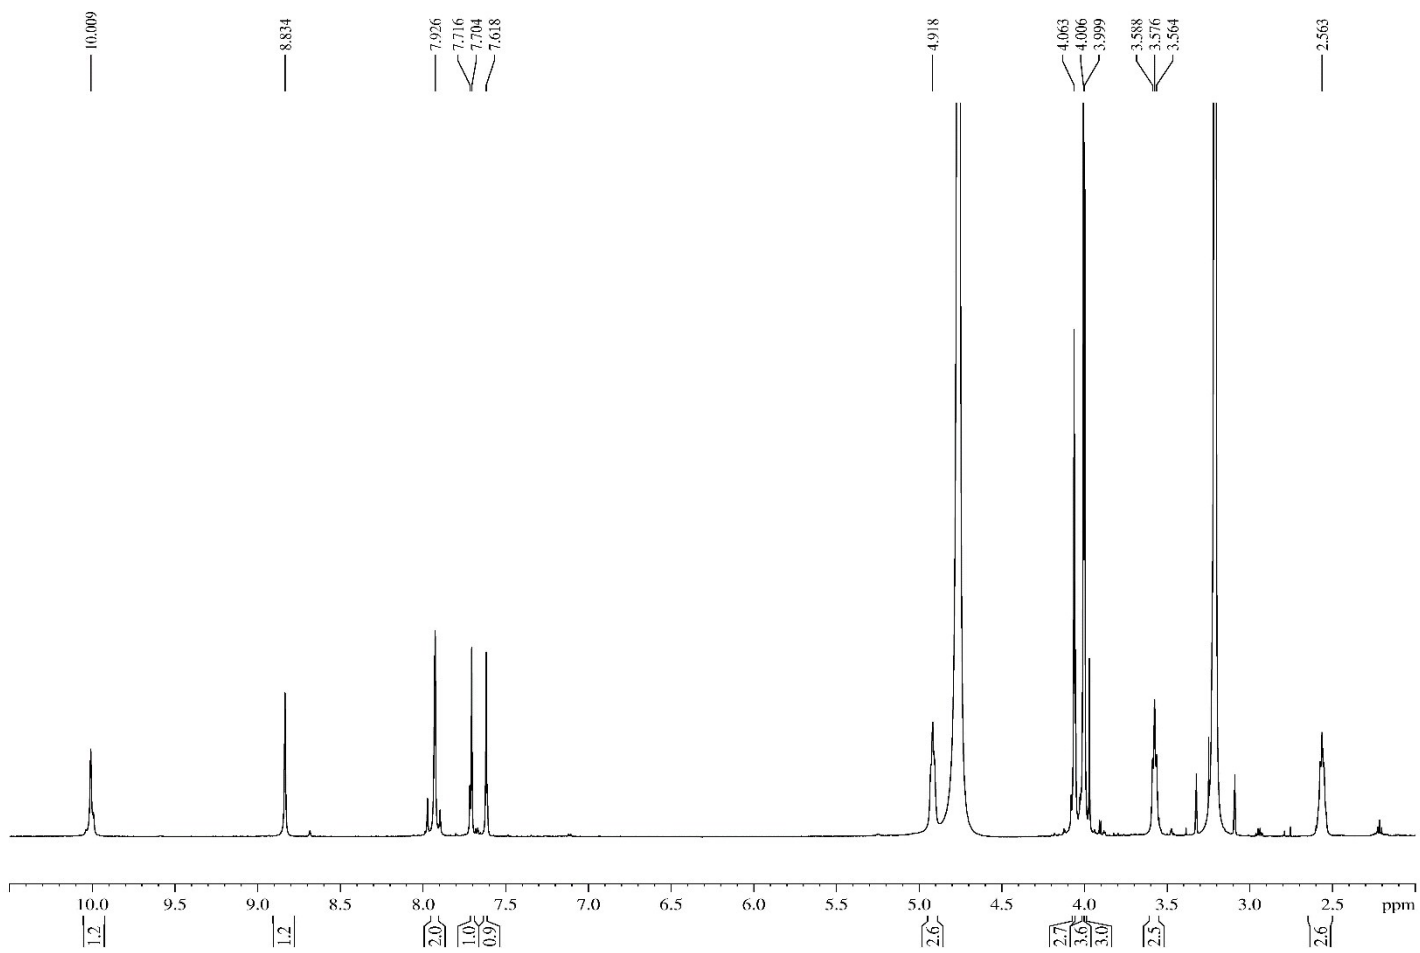

94

95

Figure S19  $^1\text{H}$  NMR spectrum of compound 4.

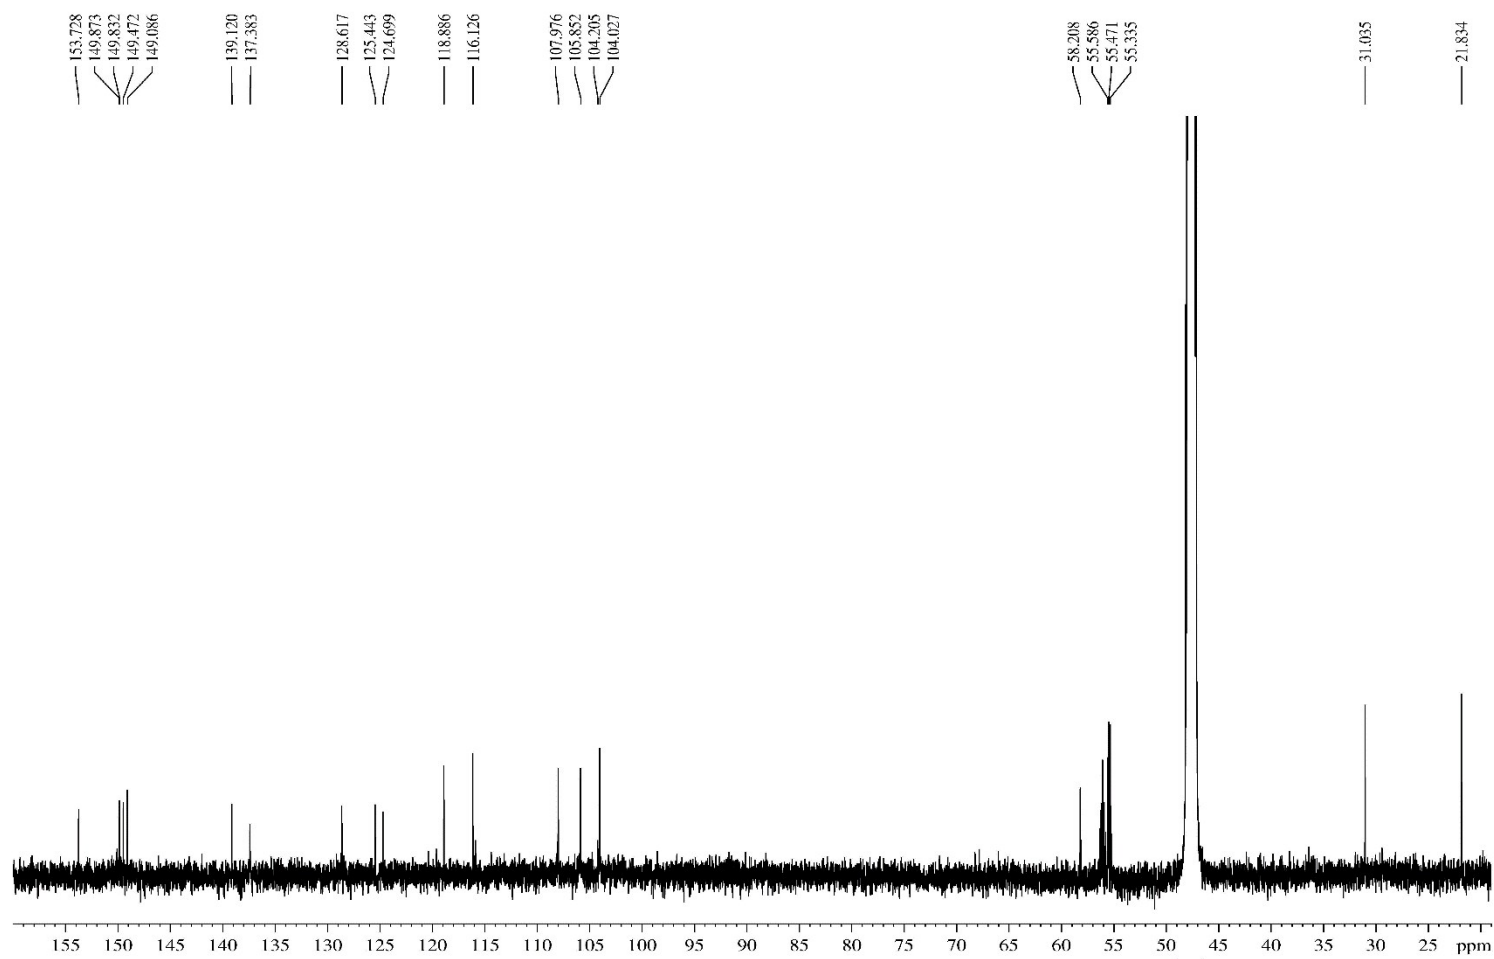

96

97

Figure S20  $^{13}\text{C}$  NMR spectrum of compound 4.

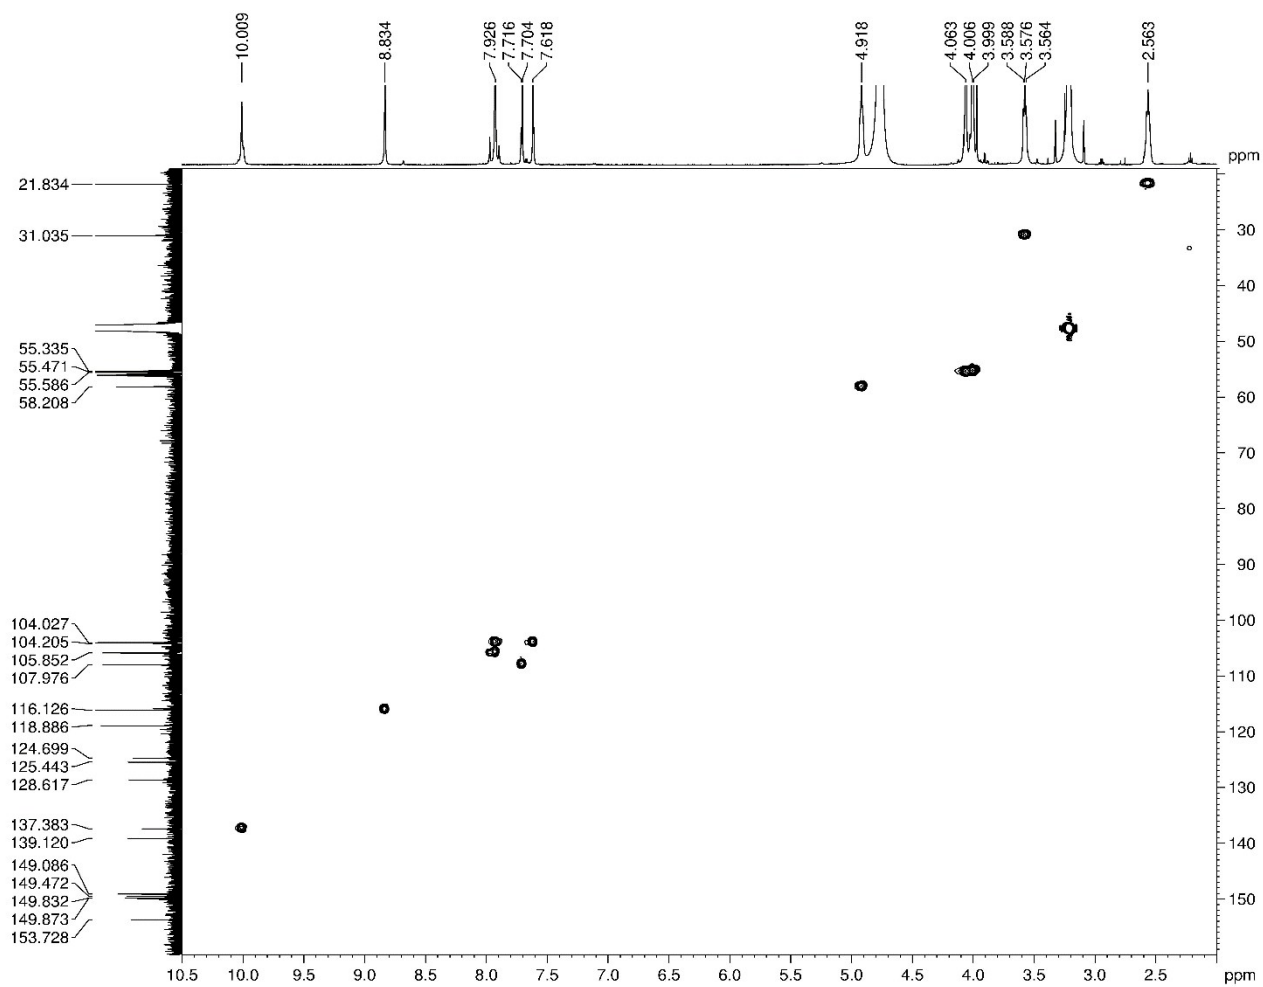

98

99

Figure S21 HSQC spectrum of compound 4.

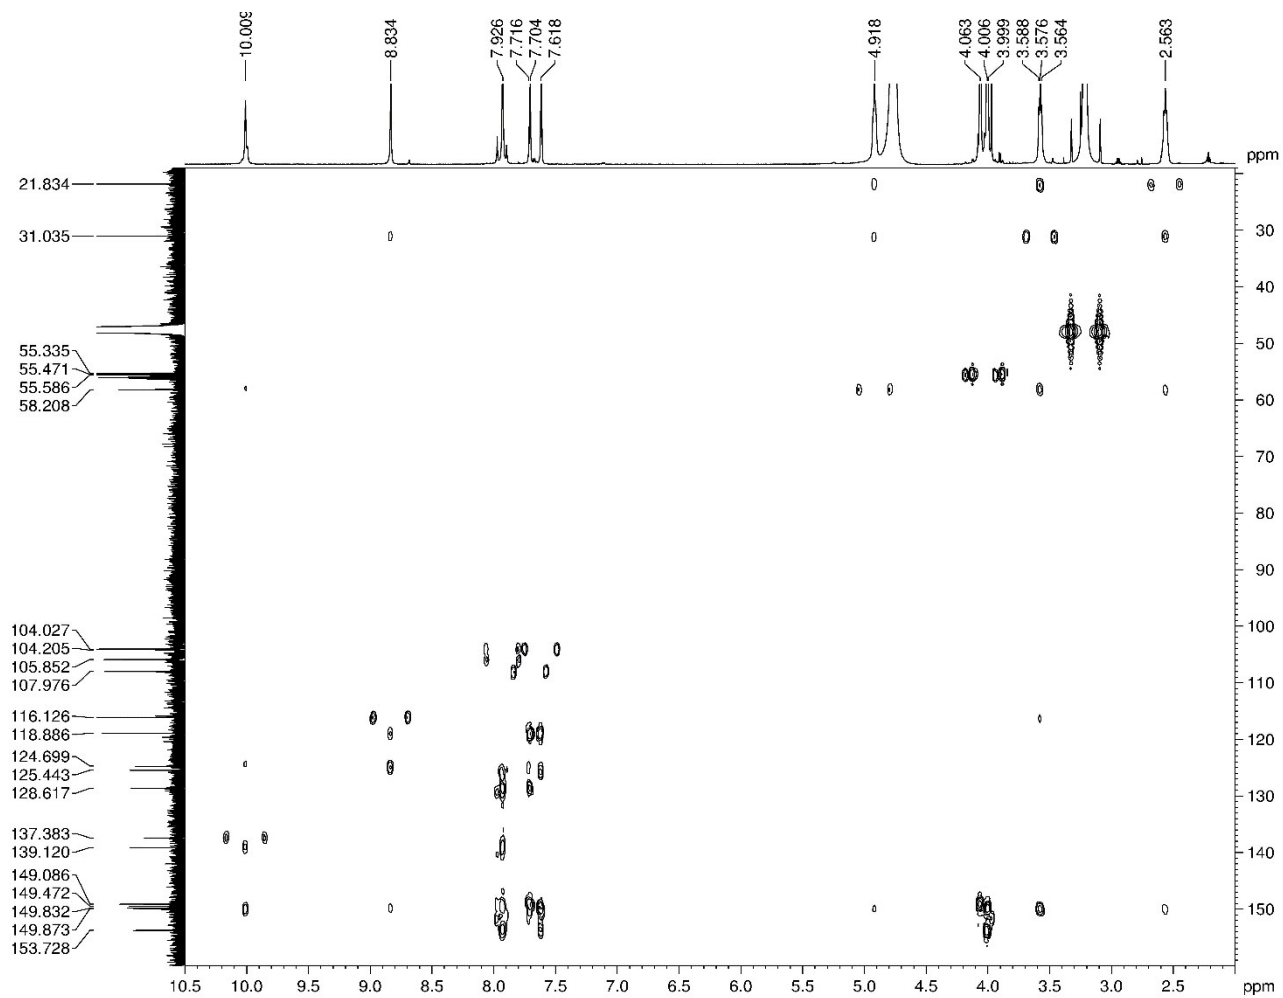

100

101

Figure S22 HMBC spectrum of compound 4.

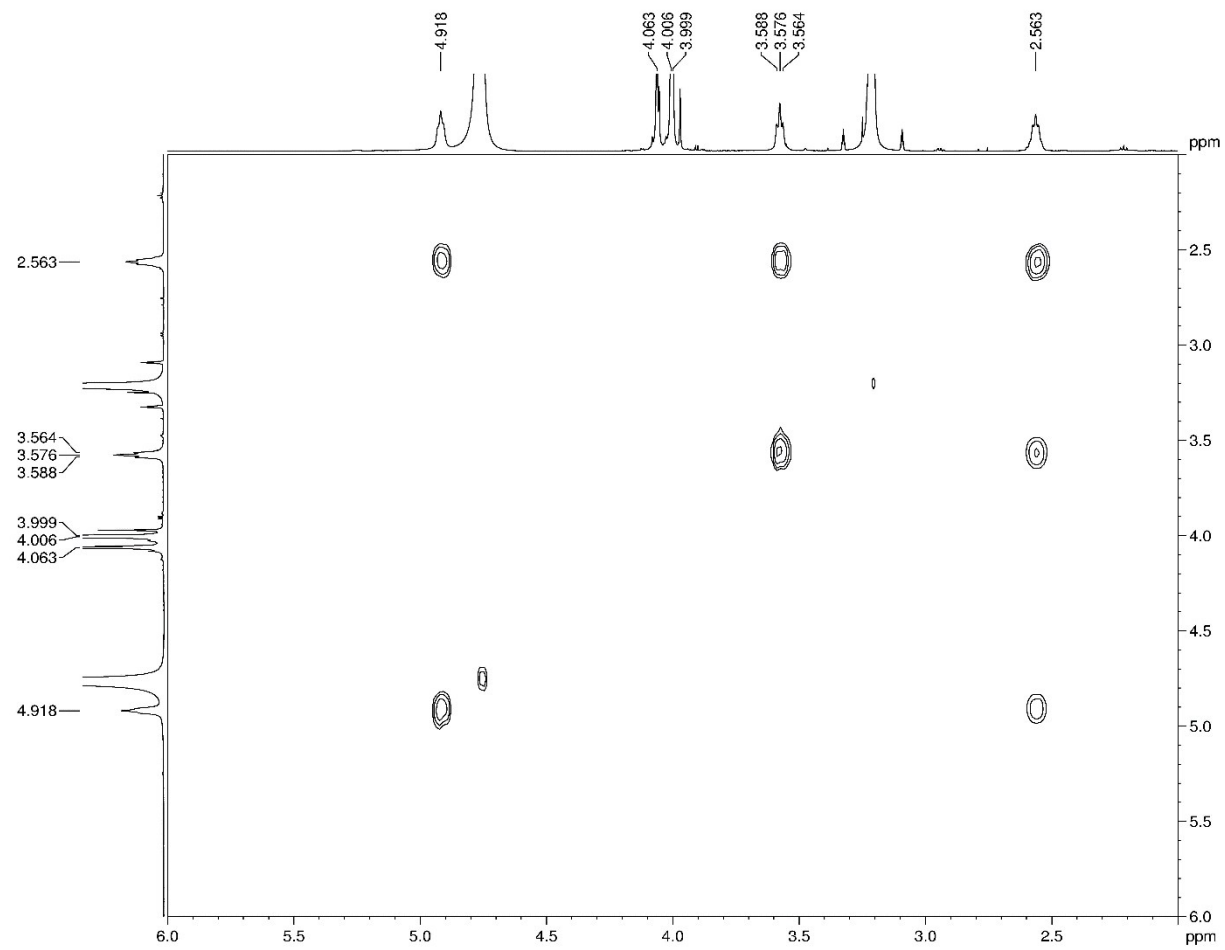

102

103

**Figure S23**  $^1\text{H}$ - $^1\text{H}$  COSY spectrum of compound 4.



104 Table S1 Percent fluorescence decrease of TO at the maximum emission wavelength  
105 of 530 nm by compound **6** or **7** displacement

| Concentration ( $\mu\text{M}$ ) | Percent fluorescence decrease (%) |          |
|---------------------------------|-----------------------------------|----------|
|                                 | <b>6</b>                          | <b>7</b> |
| 4.9                             | 47.6                              | 53.5     |
| 9.5                             | 72.8                              | 71.1     |

106

107 **Table S2**  $^1\text{H}$ -NMR (600 MHz) and  $^{13}\text{C}$ -NMR (150 MHz) spectral data of **6** ( $\delta$  in ppm,  
108  $J$  in Hz, measured in  $\text{CD}_3\text{OD}$ ).

| position          | $\delta_{\text{H}}$ | $\delta_{\text{C}}$ |
|-------------------|---------------------|---------------------|
| 1                 | 7.98, d, 6.6        | 126.9               |
| 2                 | 6.86, d, 7.2        | 115.4               |
| 3                 |                     | 161.8               |
| 4                 | 6.67, s             | 104.5               |
| 5                 | 6.81, s             | 107.6               |
| 6                 |                     | 148.0               |
| 7                 |                     | 148.6               |
| 8                 | 7.12, s             | 103.5               |
| 9                 | 9.38, s             | 136.3               |
| 11                | 4.77, s             | 57.9                |
| 12                | 2.57, s             | 21.3                |
| 13                | 3.45, s             | 30.8                |
| 13a               |                     | 149.5               |
| 14                | 8.18, s             | 115.2               |
| 4a                |                     | 133.3               |
| 4b                |                     | 123.5               |
| 8a                |                     | 118.6               |
| 8b                |                     | 123.1               |
| 14a               |                     | 138.7               |
| 14b               |                     | 117.4               |
| $\text{OCH}_3$ -3 | 3.86, s             | 54.8                |
| $\text{OCH}_3$ -7 | 3.98, s             | 55.9                |

109

110

111

112

113

114

115 **References**

116 1. (a) S. Alcaro, C. Musetti, S. Distinto, M. Casatti, G. Zagotto, A. Artese, L. Parrotta,  
117 F. Moraca, G. Costa, F. Ortuso, E. Maccioni and C. Sissi, *J. Med. Chem.*, 2013, 56,  
118 843. (b) LP. Bai, J. Liu, L. Han, H.-M. Ho, R. Wang, and Z.-H. Jiang, *Anal. Bioanal.*  
119 *Chem.* **2014**, 406, 5455.

120 2. J. Dai, M. Carver, C. Punchihewa, R. Jones, D. Yang, *Nucleic Acids Res.* **2007**, 35,  
121 4927.

122

123

124

125

126

127

128

129

130

131

132

133
